# Supplementary material
Source: PubMed Central journal article supplement (PMC1312417)
Supplement: pnas_0509107102_7.pdf [file pnas_0509107102_7.pdf]

4x Malonyl-CoA+ Palmitoyl-CoA

**Tsc13p**  
**Acb1p**  
**YBR159W**  
**Elo2p**  
**Ayr1p**  
**Elo3p**

**C24:0**

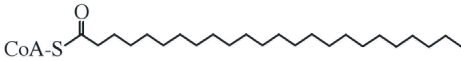

**Elo3p**

**C26:0**

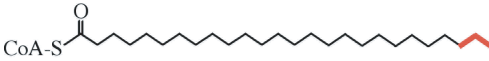

Palmitoyl-CoA + Serine

**Lcb1p**  
**Lcb2p**  
**Tsc3p**

3-Ketosphingosine

**Tsc10p**

Dehydrosphingosine (DHS)

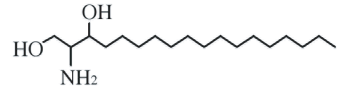

**Sur2p**

Phytosphingosine (PHS)

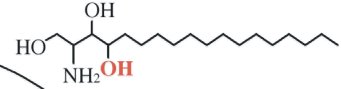

**Lac1p**  
**Lag1p**

**Ydc1p**  
**Ypc1p**

**Ceramide**

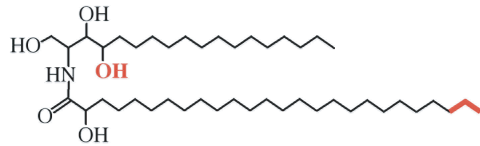

**Aur1p**

**Inositol-containing  
Sphingolipids**

IPC  
MIPC  
M(IP)<sub>2</sub>C

- **Mutants showing a sorting phenotype in this study**
- **Other non-essential enzymes**
- **Essential enzymes not in the deletion library**
